# Supplementary material
Source: Atypon-hosted journal article supplement (https://static.yanyin.tech/literature/current_protocol/10.1002/cpz1.940/attachments/downloadSupplement)
Supplement: downloadSupplement [file downloadSupplement]

## Sheet: PSD_dis_overlap
HDO.ID.A	N.A	HDO.ID.B	N.B	sAB	Separated	Overlap	zScore	pvalue	Separation/Overlap.than.chance	Bonferroni	p.adjusted	q-value
DOID:10652	302	DOID:10652	302	0	.	.	0	1	larger	.	1	1
DOID:10652	302	DOID:3312	153	-0.261233	.	YES	-3.06988	0.00214146	Smaller	.	0.0402285	0.00963659
DOID:10652	302	DOID:14330	138	-0.339587	.	YES	-5.29342	1.20048e-07	Smaller	***	6.01375e-06	1.44057e-06
DOID:10652	302	DOID:0060041	128	-0.170829	.	YES	-1.84298	0.0653317	Smaller	.	0.701309	0.167996
DOID:10652	302	DOID:1826	185	-0.289492	.	YES	-3.16643	0.00154323	Smaller	.	0.0331318	0.0079366
DOID:10652	302	DOID:5419	453	-0.367881	.	YES	-4.07061	4.689e-05	Smaller	**	0.00140936	0.000337608
DOID:10652	302	DOID:9255	91	-0.0427752	.	YES	-0.595302	0.551642	Smaller	.	1	0.902686
DOID:10652	302	DOID:1059	128	-0.0559309	.	YES	0.451151	0.651881	larger	.	1	0.977821
DOID:3312	153	DOID:3312	153	0	.	.	0	1	larger	.	1	1
DOID:3312	153	DOID:14330	138	-0.191231	.	YES	-1.44641	0.148063	Smaller	.	1	0.333143
DOID:3312	153	DOID:0060041	128	-0.460359	.	YES	-6.15873	7.33304e-10	Smaller	***	5.5102e-08	1.31995e-08
DOID:3312	153	DOID:1826	185	-0.253177	.	YES	-2.52621	0.01153	Smaller	.	0.157525	0.0377345
DOID:3312	153	DOID:5419	453	-0.41342	.	YES	-7.89829	2.82766e-15	Smaller	***	4.24952e-13	1.01796e-13
DOID:3312	153	DOID:9255	91	-0.0711539	.	YES	0.0131346	0.98952	larger	.	1	1
DOID:3312	153	DOID:1059	128	-0.111438	.	YES	-0.128705	0.897591	Smaller	.	1	1
DOID:14330	138	DOID:14330	138	0	.	.	0	1	larger	.	1	1
DOID:14330	138	DOID:0060041	128	-0.178868	.	YES	-1.25356	0.210004	Smaller	.	1	0.420007
DOID:14330	138	DOID:1826	185	-0.248327	.	YES	-2.45515	0.0140828	Smaller	.	0.176368	0.0422483
DOID:14330	138	DOID:5419	453	-0.129652	.	YES	-1.91773	0.0551451	Smaller	.	0.637495	0.15271
DOID:14330	138	DOID:9255	91	-0.0921475	.	YES	-0.249562	0.802926	Smaller	.	1	1
DOID:14330	138	DOID:1059	128	-0.0953386	.	YES	0.116758	0.907052	larger	.	1	1
DOID:0060041	128	DOID:0060041	128	0	.	.	0	1	larger	.	1	1
DOID:0060041	128	DOID:1826	185	-0.201489	.	YES	-1.69922	0.089278	Smaller	.	0.894471	0.214267
DOID:0060041	128	DOID:5419	453	-0.188213	.	YES	-3.65353	0.000258663	Smaller	**	0.00647883	0.00155198
DOID:0060041	128	DOID:9255	91	0.087437	YES	.	2.58244	0.00981036	larger	.	0.147434	0.0353173
DOID:0060041	128	DOID:1059	128	-0.28125	.	YES	-2.90401	0.00368415	Smaller	.	0.0615188	0.0147366
DOID:1826	185	DOID:1826	185	0	.	.	0	1	larger	.	1	1
DOID:1826	185	DOID:5419	453	-0.290077	.	YES	-4.2667	1.9839e-05	Smaller	***	0.000745372	0.000178551
DOID:1826	185	DOID:9255	91	0.00861387	YES	.	1.20365	0.228725	larger	.	1	0.433374
DOID:1826	185	DOID:1059	128	-0.183767	.	YES	-1.34093	0.179945	Smaller	.	1	0.381059
DOID:5419	453	DOID:5419	453	0	.	.	0	1	larger	.	1	1
DOID:5419	453	DOID:9255	91	0.0912423	YES	.	0.825631	0.409013	larger	.	1	0.736224
DOID:5419	453	DOID:1059	128	-0.0529133	.	YES	-0.458839	0.64635	Smaller	.	1	0.977821
DOID:9255	91	DOID:9255	91	0	.	.	0	1	larger	.	1	1
DOID:9255	91	DOID:1059	128	-0.0363501	.	YES	0.702589	0.482312	larger	.	1	0.82682
DOID:1059	128	DOID:1059	128	0	.	.	0	1	larger	.	1	1
